# Supplementary material for: A cationic organoiridium(iii) complex-based AIEgen for selective light-up detection of rRNA and nucleolar staining
Source: Royal Society of Chemistry journal article supplement (doi:10.1039/c8dt02099j), 2018-01-01
Supplement: c8dt02099j1.pdf [file c8dt02099j1.pdf]

## Electronic Supplementary Information (ESI)

*For*

### **Cationic Organoiridium(III) Complex Based AIEgen for Selective Light up Detection of rRNA and Nucleolar Staining**

*Sanjoy Kumar Sheet,<sup>a</sup> Bhaskar Sen,<sup>a</sup> Kripamoy Aguan<sup>b</sup> and Snehadrinarayan Khatua<sup>a\*</sup>*

<sup>a</sup>Centre for Advanced Studies, Department of Chemistry, North Eastern Hill University,  
Shillong, Meghalaya 793022, India. \*Email: [snehadri@gmail.com](mailto:snehadri@gmail.com); [skhatua@nehu.ac.in](mailto:skhatua@nehu.ac.in)

<sup>b</sup>Department of Biotechnology and Bioinformatics, North Eastern Hill University, Shillong,  
Meghalaya 793022, India.

| <b>Table of Contents</b> |                                                                                                                     | <b>Page no</b> |
|--------------------------|---------------------------------------------------------------------------------------------------------------------|----------------|
| 1                        | List of compounds                                                                                                   | S2             |
| 2                        | NMR spectra of <b>2</b> [PF <sub>6</sub> ]                                                                          | S3-S5          |
| 3                        | ESI-MS spectra of <b>2</b> [PF <sub>6</sub> ]                                                                       | S5             |
| 4                        | CV of compound <b>2</b> [PF <sub>6</sub> ]                                                                          | S6             |
| 5                        | Theoretical UV-vis of <b>2</b>                                                                                      | S6             |
| 6                        | Solubility chart                                                                                                    | S7             |
| 7                        | Solvent dependent luminescence study                                                                                | S7             |
| 8                        | PL spectra of complex in CH <sub>3</sub> CN–PEG and THF–PEG mixture                                                 | S8             |
| 9                        | UV spectra of complex in CH <sub>3</sub> CN–water mixture                                                           | S9             |
| 10                       | PL spectra of control probe <b>1</b> [PF <sub>6</sub> ] <sub>2</sub> in CH <sub>3</sub> CN–H <sub>2</sub> O mixture | S9             |
| 11                       | SEM image of <b>2</b> [PF <sub>6</sub> ] (10 μM) in CH <sub>3</sub> CN                                              | S10            |
| 12                       | PL titration of <b>2</b> [PF <sub>6</sub> ] with rRNA                                                               | S10            |
| 13                       | PL spectra of <b>2</b> [PF <sub>6</sub> ] in the presence anions and cations                                        | S11            |
| 14                       | PL spectra of <b>2</b> [PF <sub>6</sub> ] in DNase and RNase free buffer                                            | S12            |
| 15                       | Crystal structure of <b>2</b> [PF <sub>6</sub> ] from incomplete data set                                           | S12            |
| 16                       | Computational studies                                                                                               | S13-S15        |
| 17                       | Molecular docking                                                                                                   | S16-S17        |

**Chart S1. List of Compounds used in this study**

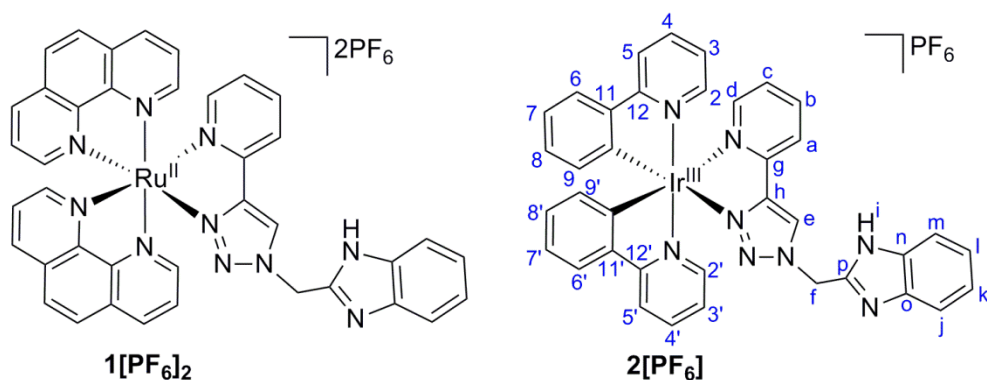

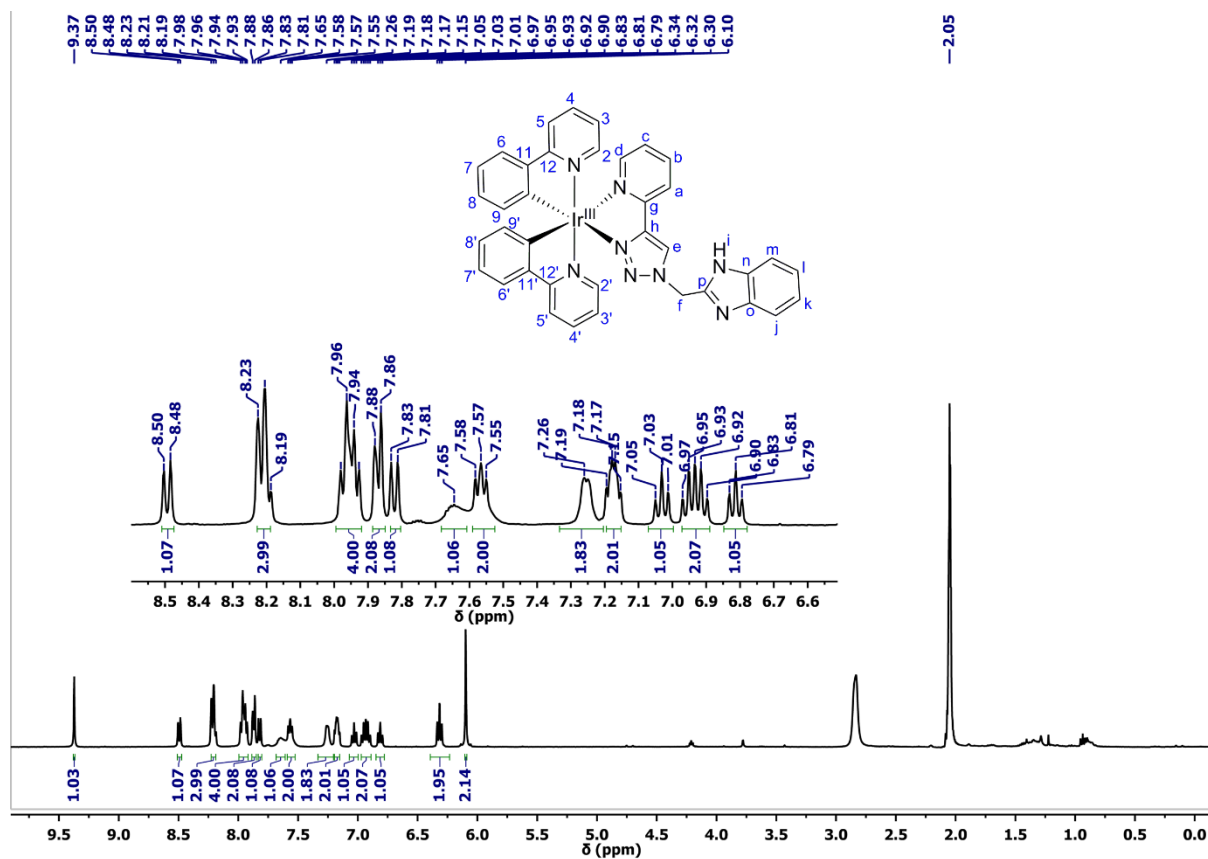

Figure S1.  $^1\text{H}$  NMR of  $2[\text{PF}_6]$  in acetone- $d_6$ .

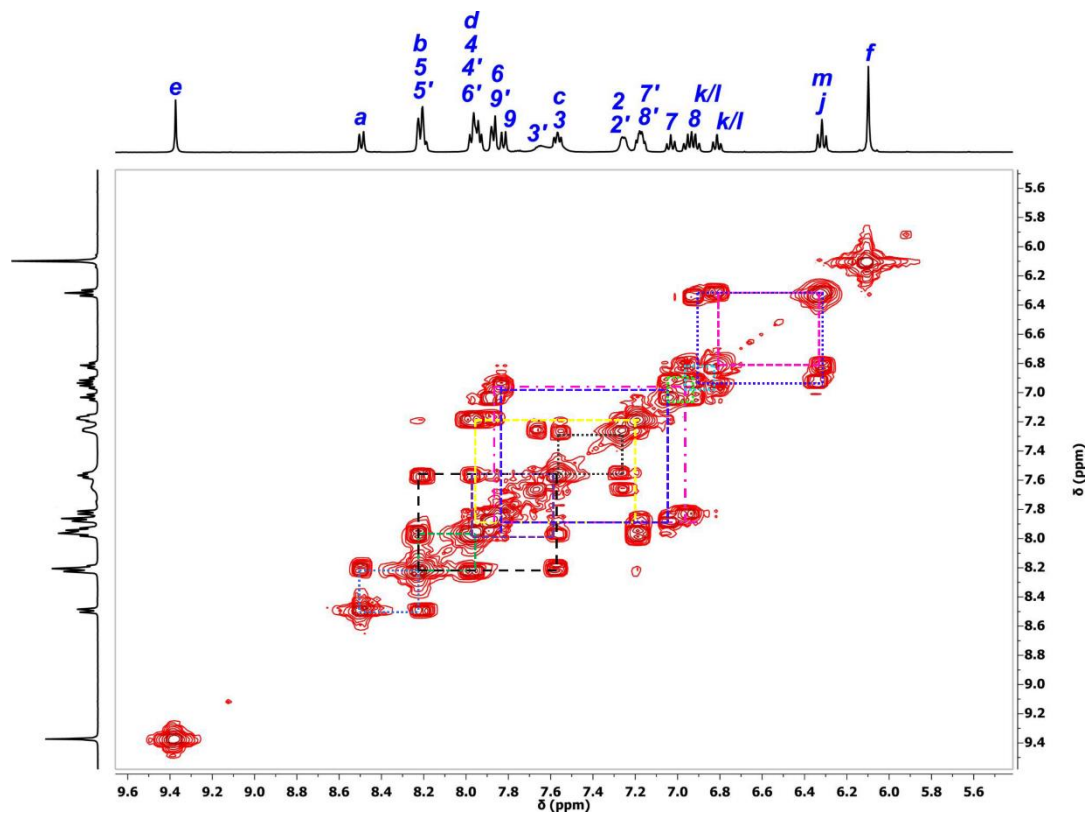

Figure S2.  $^1\text{H}$ - $^1\text{H}$  COSY NMR spectrum of  $2[\text{PF}_6]$  in acetone- $d_6$ .

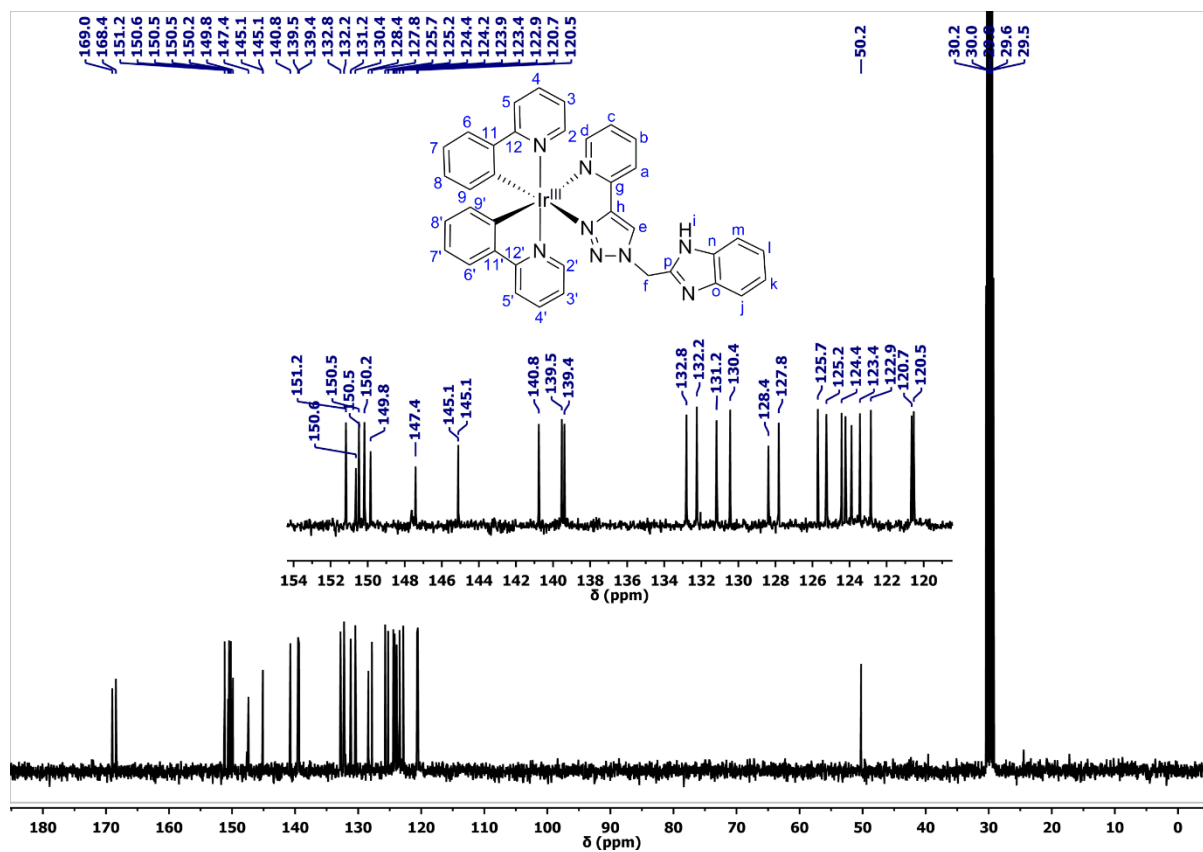

Figure S3.  $^{13}C$  NMR spectrum of  $2[PF_6]$  in acetone- $d_6$ .

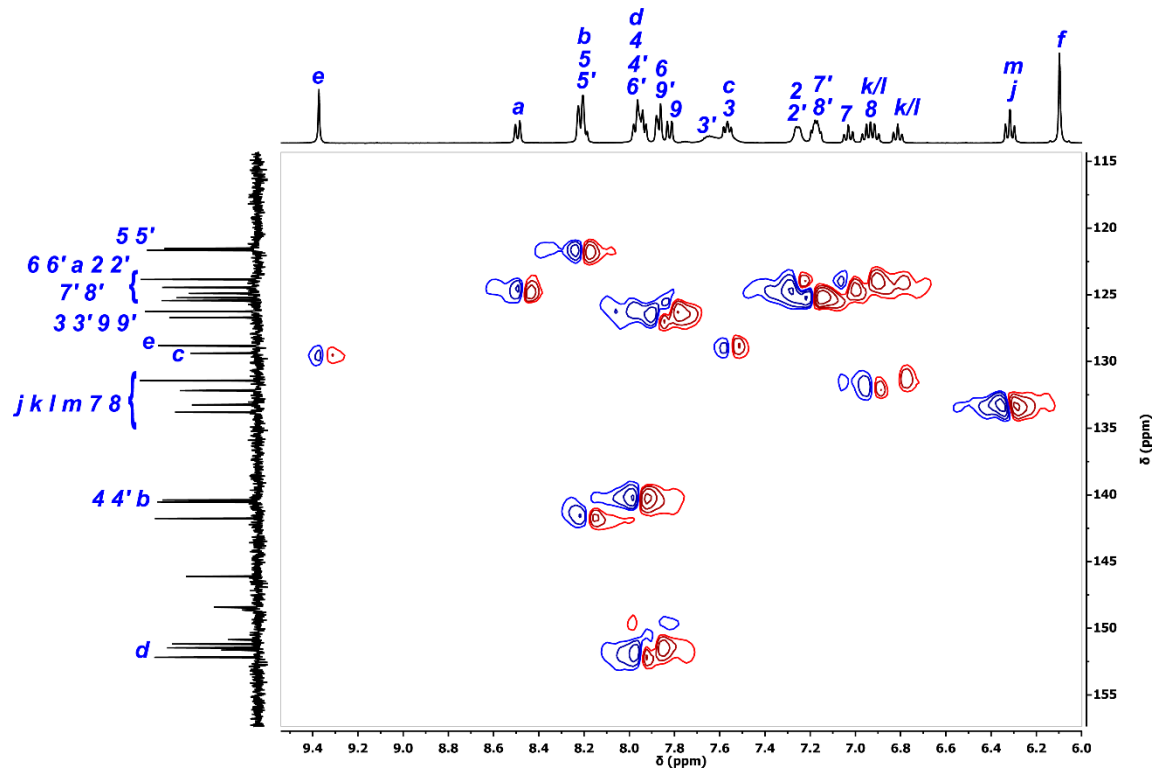

Figure S4.  $^1H$ - $^{13}C$  HSQC spectrum of  $2[PF_6]$  in acetone- $d_6$ .

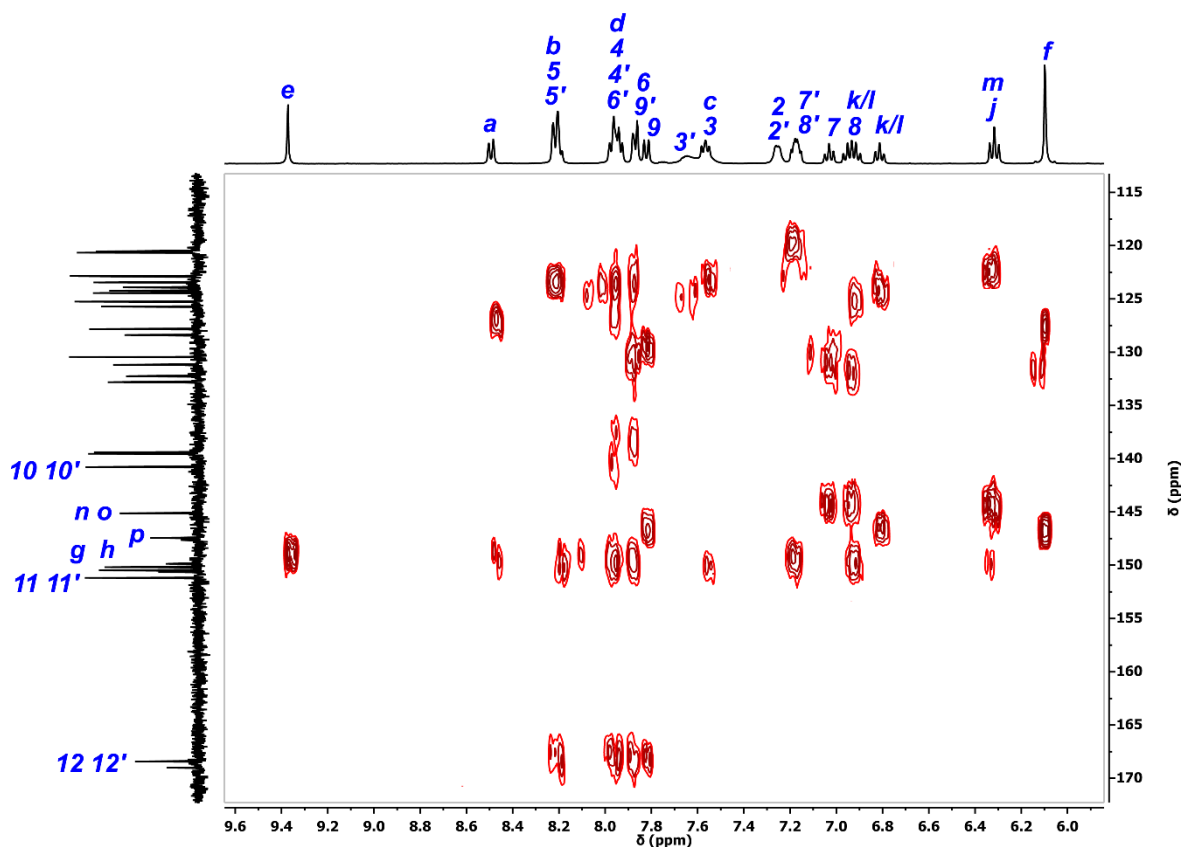

**Figure S5.**  $^1\text{H}$ - $^{13}\text{C}$  HMBC spectrum of  $2[\text{PF}_6]$  in acetone- $d_6$ .

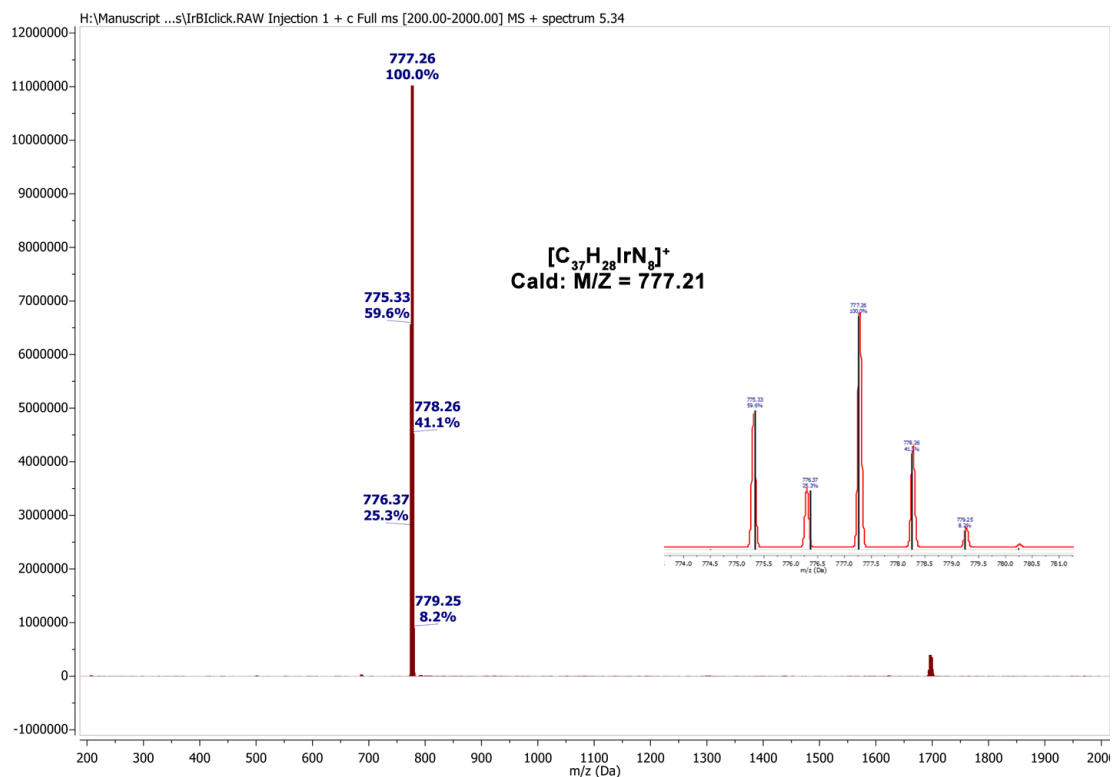

**Figure S6.** ESI-MS spectrum of  $2[\text{PF}_6]$  in  $\text{CH}_3\text{CN}$  and isotopic distribution pattern. Colour code: black corresponds to experimentally obtained and red corresponds to theoretically calculated.

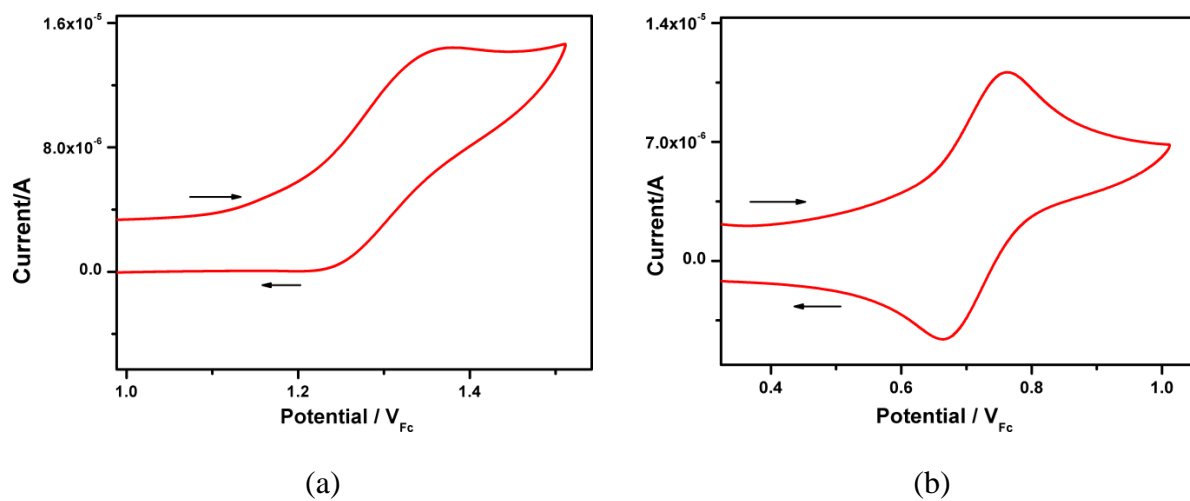

**Figure S7.** Cyclic voltammetric (CV) analysis of (a) **2**[PF<sub>6</sub>] (1.0 mM) and (b) [Ir(ppy)<sub>3</sub>] in dry and degassed acetonitrile solution versus the Fc/Fc<sup>+</sup> couple.

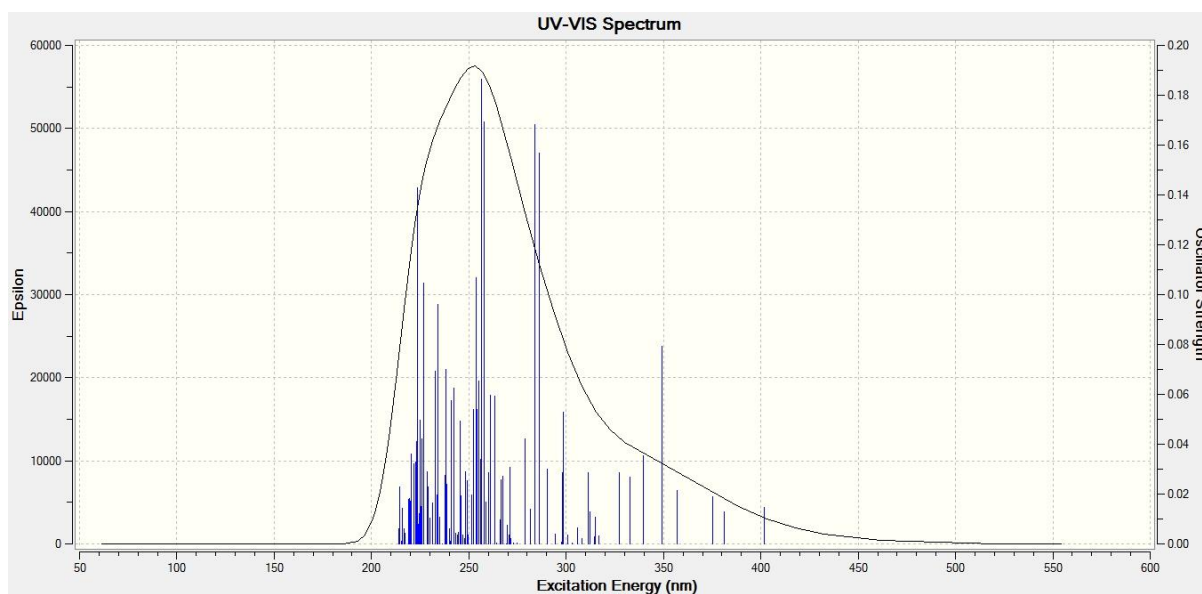

**Figure S8.** Theoretical UV-vis spectrum of **2**.

Chart S2. Solubility Chart

| Solvents        | Solubility                       |                     |
|-----------------|----------------------------------|---------------------|
|                 | 1[PF <sub>6</sub> ] <sub>2</sub> | 2[PF <sub>6</sub> ] |
| Hexane          | ×                                | ×                   |
| Dichloromethane | ✓                                | ✓                   |
| Chloroform      | ×                                | ✓                   |
| MeOH            | ✓                                | ✓                   |
| Acetone         | ✓                                | ✓                   |
| Acetonitrile    | ✓                                | ✓                   |
| THF             | ✓                                | ✓                   |
| DMSO            | ✓                                | ✓                   |
| Water*          | ×                                | ×                   |

\*It is notable that the compound is insoluble in water at high concentration of the probe but at 10  $\mu\text{M}$  concentration both the compounds have better solubility even in 99% water ( $\text{CH}_3\text{CN}$  or DMSO as a co solvent).

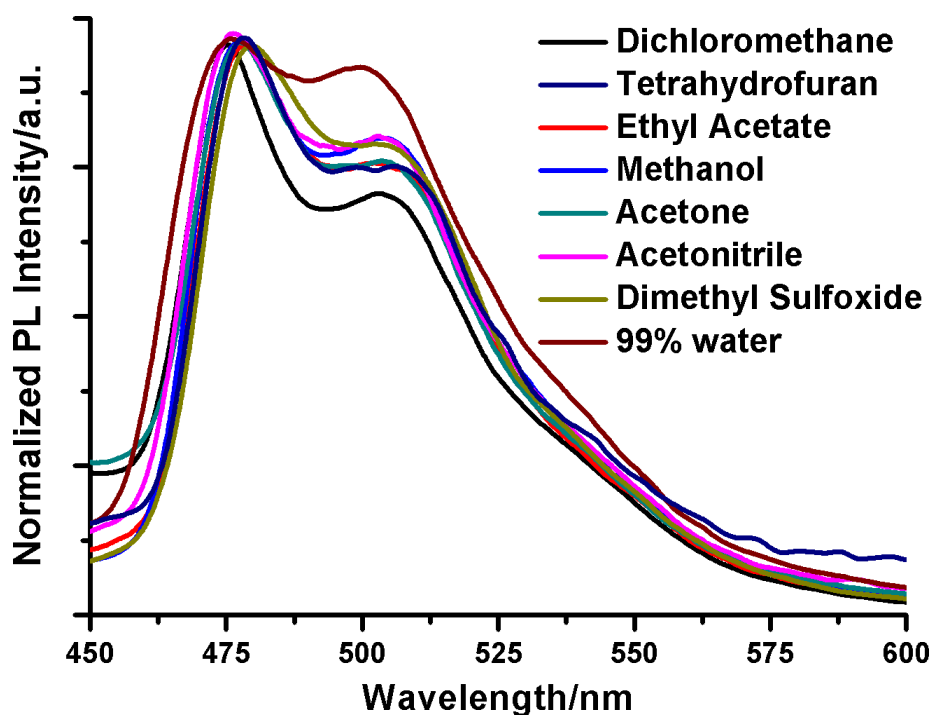

Figure S9. PL spectra of 2[PF<sub>6</sub>] in different solvents.

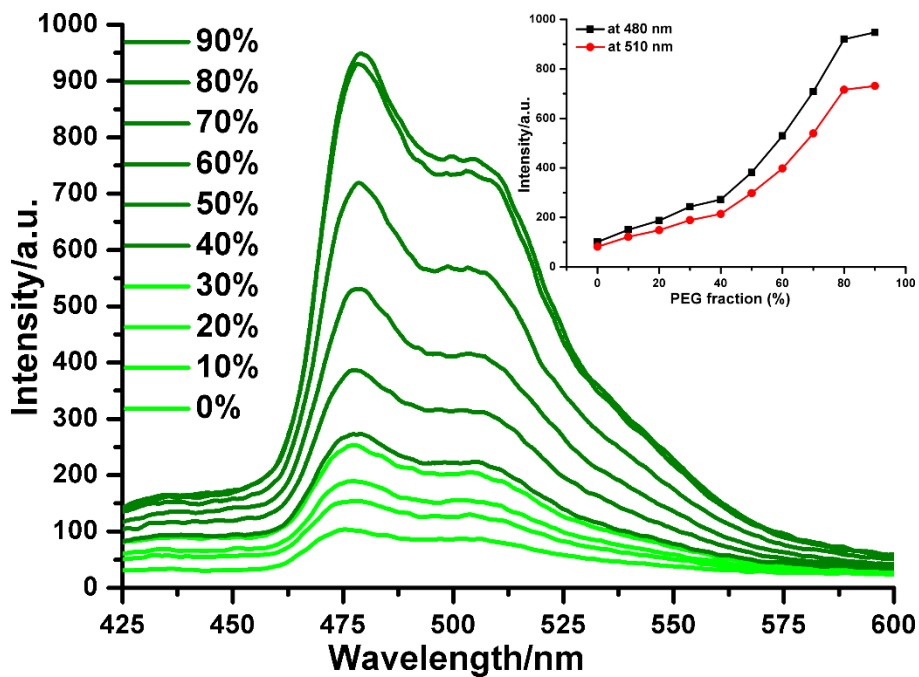

**Figure S10.** PL spectra of  $2[\text{PF}_6]$  (10  $\mu\text{M}$ ) in  $\text{CH}_3\text{CN}$ -PEG mixture, (inset) Plot of PL intensity vs. different fraction of PEG in  $\text{CH}_3\text{CN}$ . ( $\lambda_{\text{ex}} = 384 \text{ nm}$ ;  $\lambda_{\text{em}} = 480$  and  $510$ ).

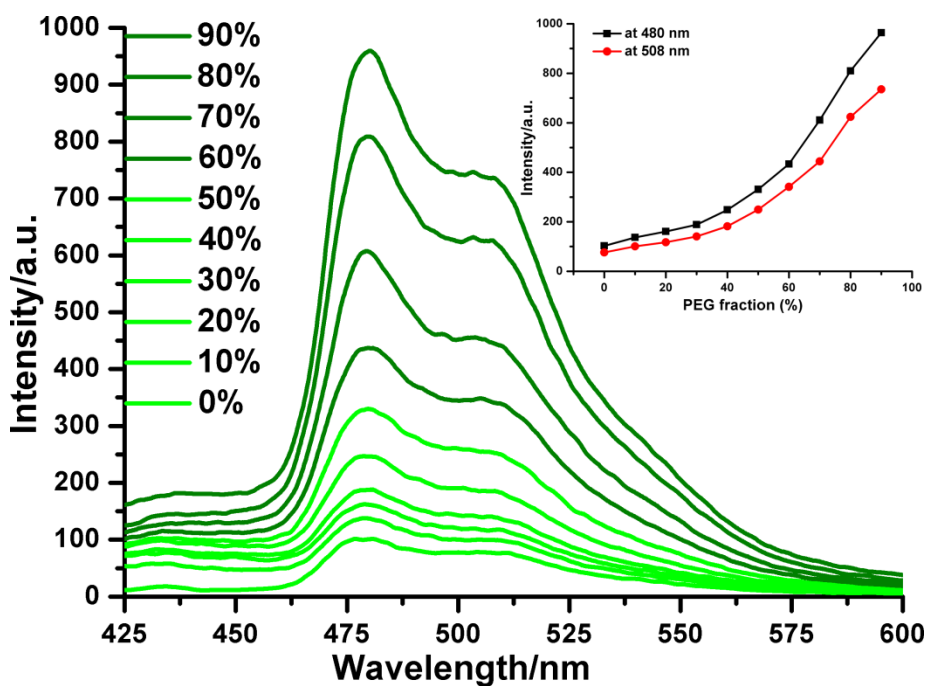

**Figure S11.** PL spectra of  $2[\text{PF}_6]$  (10  $\mu\text{M}$ ) in THF-PEG mixture, (inset) Plot of PL intensity vs. different fraction of PEG in THF. ( $\lambda_{\text{ex}} = 384 \text{ nm}$ ;  $\lambda_{\text{em}} = 480$  and  $508$ ).



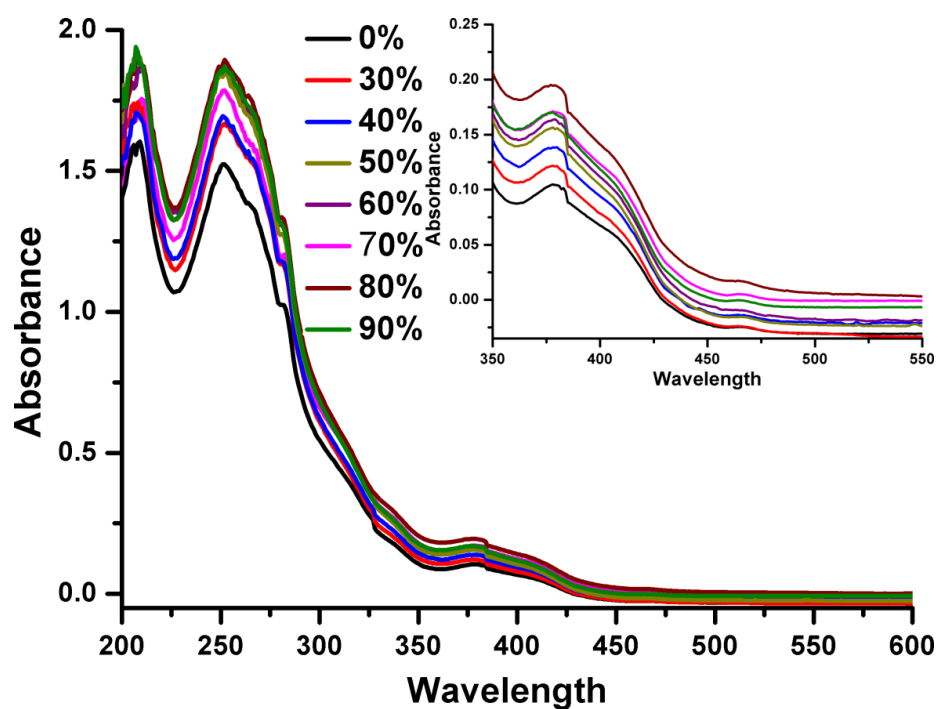

**Figure S12.** Absorption spectra of 2[PF<sub>6</sub>] in CH<sub>3</sub>CN/H<sub>2</sub>O mixtures with different H<sub>2</sub>O fraction (0-90%).

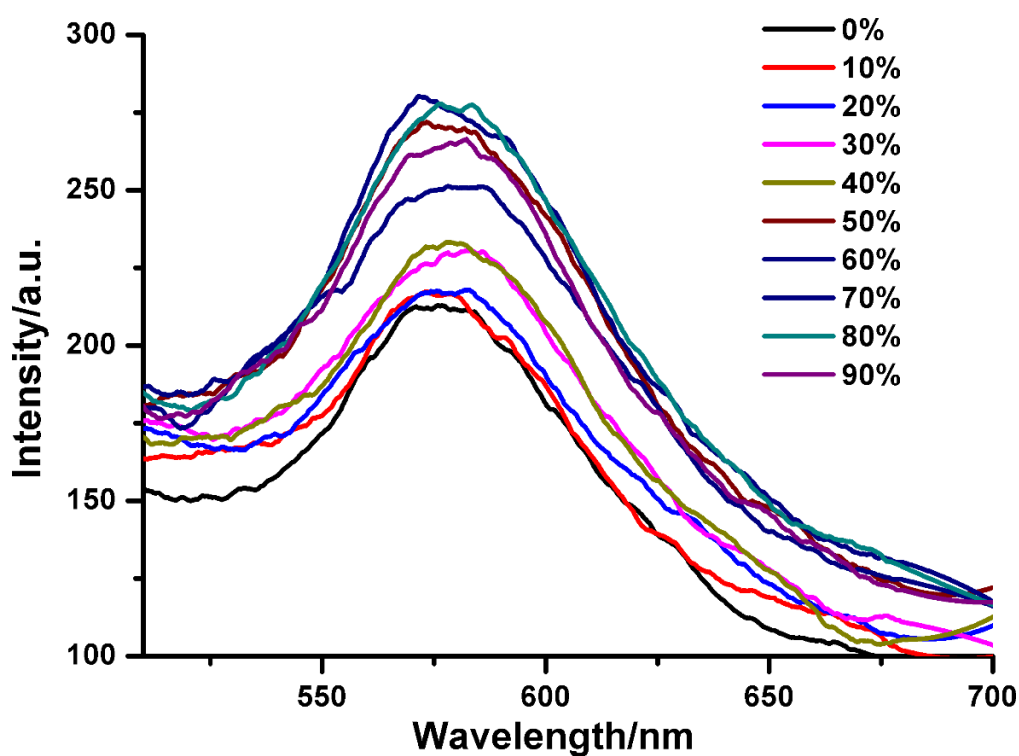

**Figure S13.** PL spectra of 1[PF<sub>6</sub>]<sub>2</sub> (10 μM) in CH<sub>3</sub>CN-H<sub>2</sub>O mixture ( $\lambda_{\text{ex}} = 459$  nm;  $\lambda_{\text{em}} = 577$  nm).

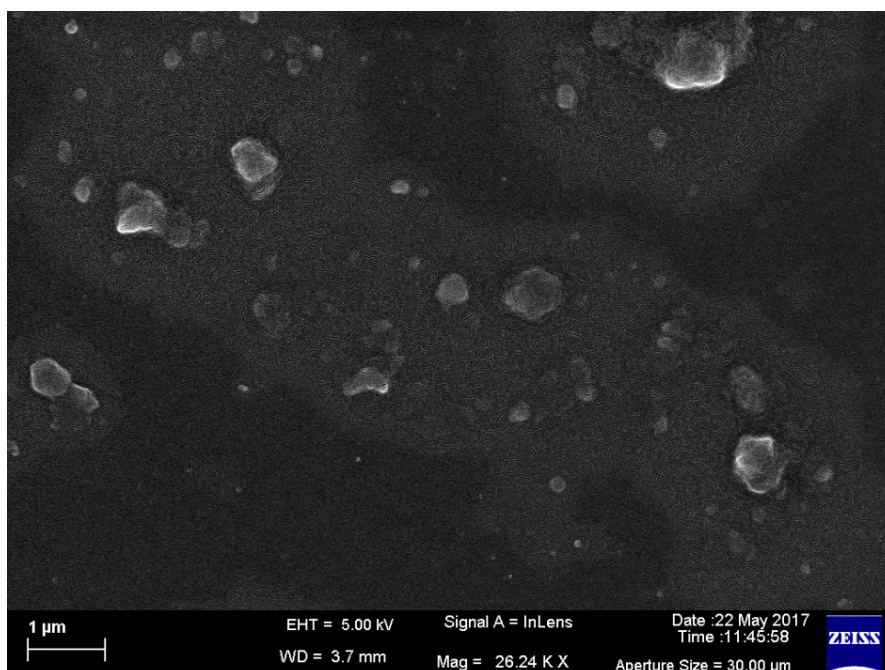

**Figure S14.** SEM image of  $2[\text{PF}_6]$  ( $10 \mu\text{M}$ ) in  $\text{CH}_3\text{CN}$ .

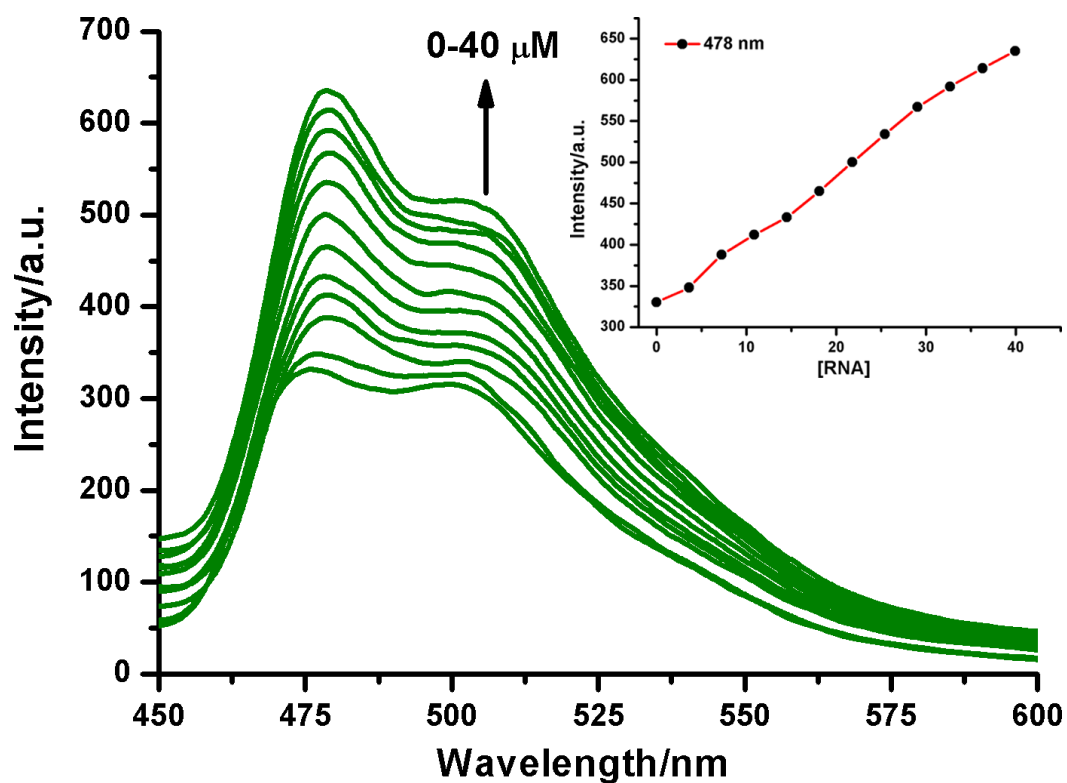

**Figure S15.** PL titration of  $2[\text{PF}_6]$  with rRNA (0-4 fold) in  $\text{CH}_3\text{CN}/\text{PBS}$  buffer (1:99; v/v, pH 7.4). (*Inset*) Plot of emission intensity as a function of [RNA].

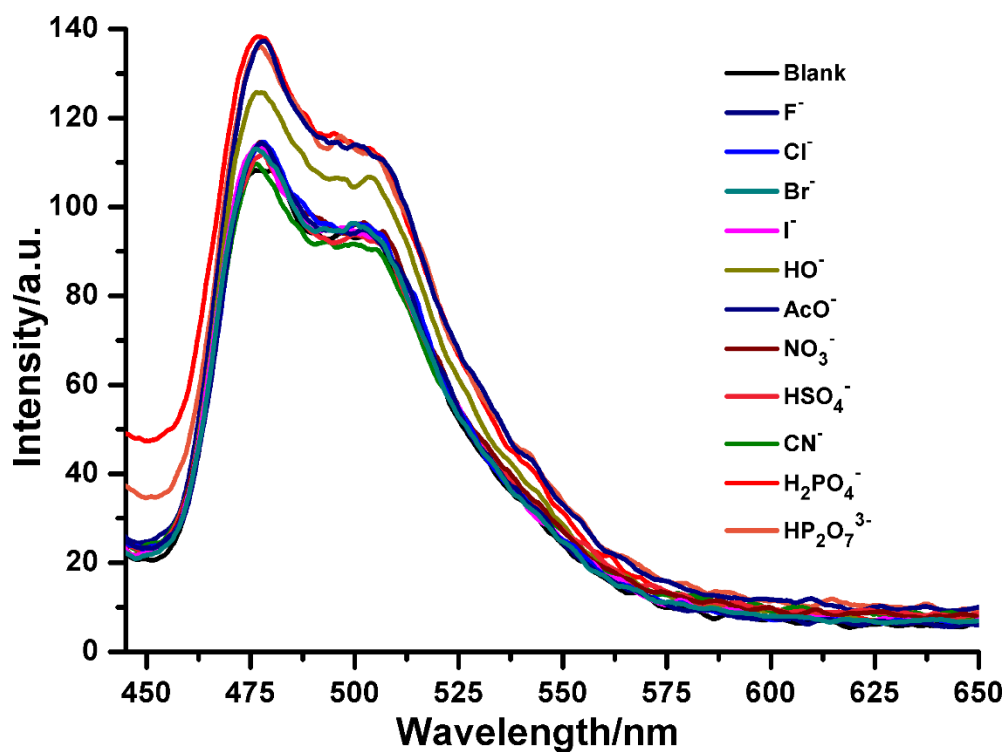

**Figure S16.** Emission spectra of  $2[\text{PF}_6]$  in the presence of several anions in  $\text{CH}_3\text{CN}$ .

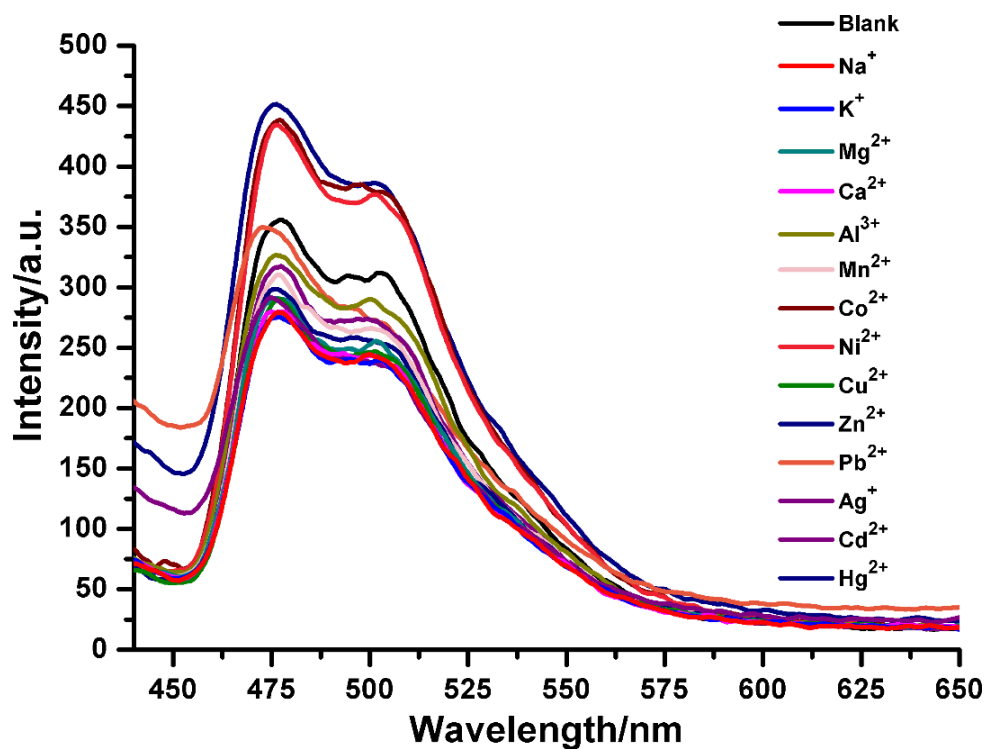

**Figure S17.** Emission spectra of  $2[\text{PF}_6]$  with several cations in 50% aqueous carbonate buffer (pH 9.2)

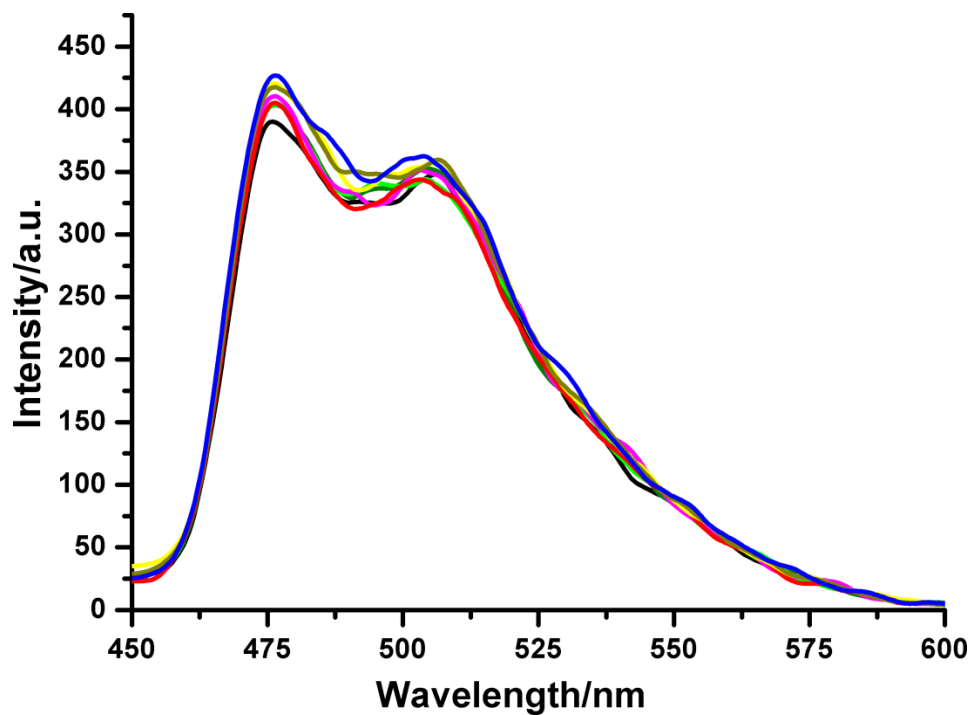

**Figure S18.** PL titration of  $2[\text{PF}_6]$  with gradual addition of DNase and RNase free aqueous buffer (0-4 fold).

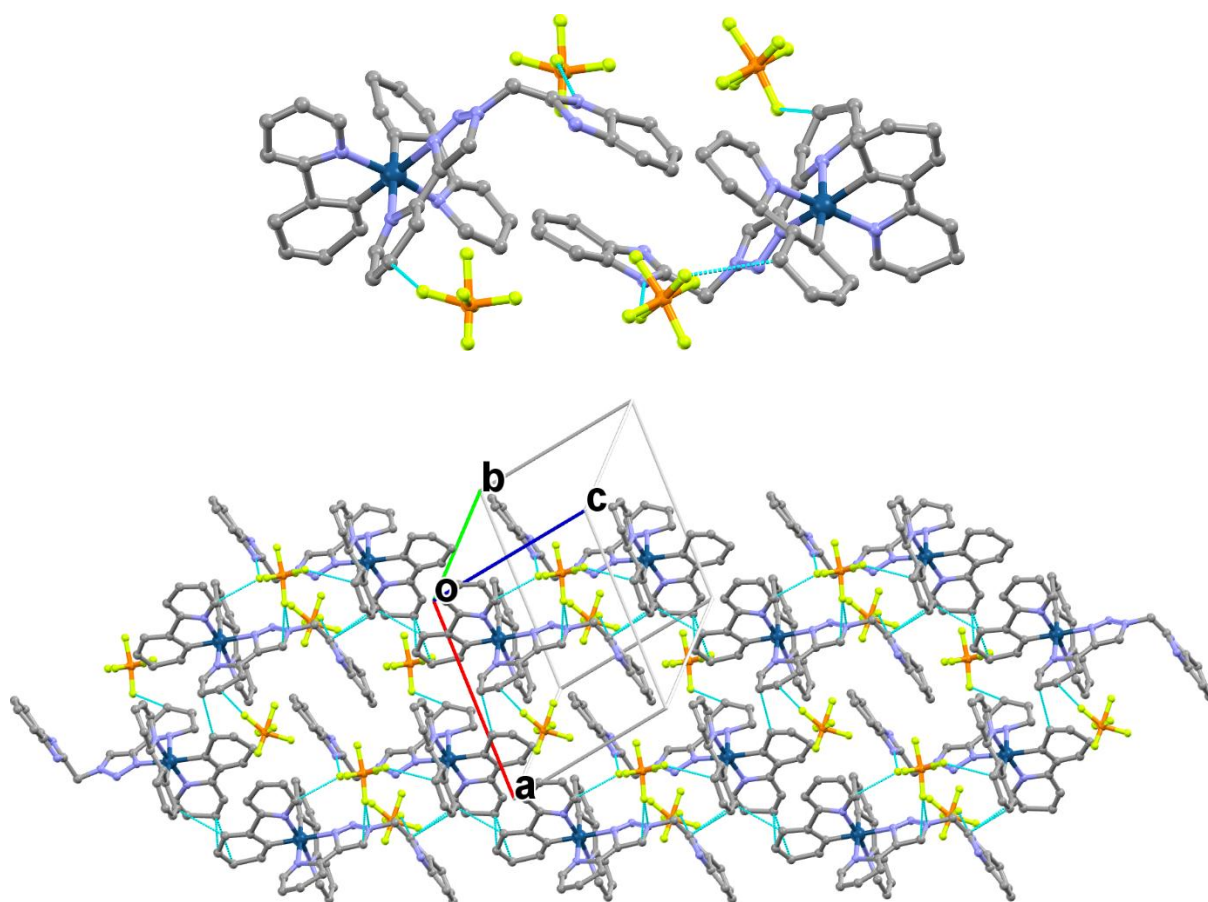

**Figure S19.** Ball stick packing representation of partially solved crystal structure of  $2[\text{PF}_6]$ .

**Table S1.** Selected bond lengths and angles in the optimized structure.

| Bond lengths (Å)   |          |                    |           |
|--------------------|----------|--------------------|-----------|
| N(17)-Ir(71)       | 2.08370  | N(61)-Ir(71)       | 2.20668   |
| C(72)-Ir(71)       | 2.01863  | N(73)-Ir(71)       | 2.08102   |
| N(60)-Ir(71)       | 2.26676  | C(74)-Ir(71)       | 2.01809   |
| Bond angles (°)    |          |                    |           |
| N(17)-Ir(71)-C(72) | 80.15564 | N(61)-Ir(71)-N(73) | 96.59987  |
| N(60)-Ir(71)-N(61) | 74.23891 | N(61)-Ir(71)-C(72) | 98.99612  |
| N(73)-Ir(71)-C(74) | 80.14838 | C(72)-Ir(71)-N(73) | 95.22523  |
| N(17)-Ir(71)-N(60) | 96.57373 | C(72)-Ir(71)-C(74) | 90.39341  |
| N(17)-Ir(71)-N(61) | 88.56240 | N(17)-Ir(71)-N(73) | 173.58341 |
| N(17)-Ir(71)-C(74) | 95.35121 | N(60)-Ir(71)-C(72) | 172.64396 |
| N(60)-Ir(71)-N(73) | 88.51983 | N(61)-Ir(71)-C(74) | 170.33257 |
| N(60)-Ir(71)-C(74) | 96.49361 |                    |           |

**Table S2.** The x,y,z Cartesian coordinates of the complex **2** calculated using Gaussian09 at B3LYP/6-31G(d,p) level and LANL2DZ for iridium.

| 2 |             |             |             |   |              |             |             |
|---|-------------|-------------|-------------|---|--------------|-------------|-------------|
| C | 2.30990900  | 1.92082500  | -2.26060200 | C | -0.14586400  | -4.11148400 | 2.41063700  |
| H | 2.65655700  | 1.05153100  | -2.81000800 | H | -0.51615100  | -5.00881200 | 2.89580300  |
| C | 2.42972900  | 3.17958200  | -2.85271000 | C | -0.96906300  | -3.38777300 | 1.55238700  |
| H | 2.86376500  | 3.26689400  | -3.84523300 | H | -1.98616800  | -3.70826800 | 1.35434300  |
| C | 2.00257400  | 4.32916300  | -2.17963100 | C | -0.46647300  | -2.23621300 | 0.94021300  |
| H | 2.10028000  | 5.30566400  | -2.64314900 | C | -1.24413100  | -1.41061500 | 0.01930500  |
| C | -0.17203900 | 3.42197900  | 3.14756900  | C | -2.54674700  | -1.45537700 | -0.44193500 |
| H | -0.51825500 | 4.20240100  | 3.81796800  | H | -3.40191500  | -2.08596000 | -0.24989800 |
| C | -0.21621000 | 2.07932600  | 3.53667800  | C | -3.78025300  | 0.02536100  | -2.10903800 |
| H | -0.59158600 | 1.77885600  | 4.50808000  | H | -3.82742700  | -0.64144600 | -2.97654400 |
| C | 0.24188700  | 1.12147100  | 2.64608500  | H | -3.53980600  | 1.02917100  | -2.46242600 |
| H | 0.23889900  | 0.06809700  | 2.89748700  | C | -5.07780100  | -0.01501400 | -1.35676900 |
| C | 1.45695800  | 4.21147600  | -0.90755500 | C | -6.76194300  | -0.69175000 | -0.21375400 |
| C | 1.33495800  | 2.94644700  | -0.30694600 | C | -7.69174900  | -1.42549000 | 0.53595400  |
| C | 0.32493700  | 3.74794100  | 1.89456600  | H | -7.50088300  | -2.46374900 | 0.78611100  |
| C | 0.77893500  | 2.74158200  | 1.02683600  | C | -8.85572500  | -0.78005100 | 0.93341500  |
| N | 0.72530400  | 1.43390500  | 1.42695300  | H | -9.59706200  | -1.32189000 | 1.51207500  |
| C | 3.85726500  | 0.76689200  | 1.81847200  | C | -9.10251800  | 0.56889600  | 0.59872100  |
| H | 3.21009500  | 1.40983200  | 2.40678600  | H | -10.02592300 | 1.03472400  | 0.92799000  |
| C | 5.19803600  | 0.64245200  | 2.19033000  | C | -8.19463400  | 1.31558400  | -0.14457300 |
| H | 5.56779800  | 1.18377800  | 3.05707600  | H | -8.39010300  | 2.35177100  | -0.40157400 |
| C | 6.07023100  | -0.16659900 | 1.45457300  | C | -7.02618000  | 0.65956500  | -0.53980400 |
| H | 7.11164500  | -0.25874600 | 1.74581300  | N | 0.80243800   | -1.80434900 | 1.16324000  |
| C | 3.70286900  | -2.79118100 | -3.18083600 | N | -0.64572300  | -0.32764200 | -0.57251300 |
| H | 4.24180900  | -3.42161800 | -3.88103100 | N | -1.48573300  | 0.28939700  | -1.35827200 |
| C | 2.33994000  | -2.53465600 | -3.35823300 | N | -2.64110100  | -0.39178500 | -1.27657400 |
| H | 1.78589600  | -2.94901300 | -4.19258200 | N | -5.53877600  | -1.08058500 | -0.74659600 |
| C | 1.69726500  | -1.72207200 | -2.43715700 | N | -5.91969900  | 1.06764700  | -1.27015300 |

|   |            |             |             |    |             |             |             |
|---|------------|-------------|-------------|----|-------------|-------------|-------------|
| H | 0.64651500 | -1.47749700 | -2.53125400 | H  | -5.77037200 | 1.98114400  | -1.67191800 |
| C | 5.59363000 | -0.84917200 | 0.34159100  | H  | 5.42194500  | -2.40235000 | -1.95382100 |
| C | 4.24547200 | -0.72637100 | -0.03640900 | H  | 6.27494200  | -1.47382100 | -0.22877800 |
| C | 4.36386800 | -2.22325400 | -2.10109800 | H  | 1.12942800  | 5.10635100  | -0.38636300 |
| C | 3.67066100 | -1.40379400 | -1.19728600 | H  | 0.37228600  | 4.78302600  | 1.57902000  |
| C | 1.59169500 | -2.51111300 | 1.99054200  | Ir | 1.44017000  | 0.05643200  | 0.03663500  |
| H | 2.59403200 | -2.12039800 | 2.13039200  | C  | 1.75602500  | 1.77039600  | -0.98191700 |
| C | 1.15781800 | -3.66697300 | 2.63383600  | N  | 2.33444400  | -1.17504800 | -1.38281600 |
| H | 1.83207800 | -4.20163900 | 3.29340900  | C  | 3.34442000  | 0.08599800  | 0.70428000  |

**Table S3.** The x,y,z Cartesian coordinates of the complex **2** dimer calculated using Gaussian09 at WB97XD/6-31G(d,p) level and LANL2DZ for iridium.

| 2-Dimer |             |             |             |   |              |             |             |
|---------|-------------|-------------|-------------|---|--------------|-------------|-------------|
| Ir      | 6.89130100  | 0.01704200  | -0.01103500 | C | -6.16838700  | -1.89761400 | 2.42552400  |
| C       | 9.27177900  | -3.18451900 | -1.71991200 | N | -3.92568800  | 2.91219800  | 1.06593400  |
| N       | 0.66706300  | -1.17811000 | -2.59798000 | C | -5.41811900  | -0.40446200 | -2.66864000 |
| C       | 6.92769300  | 1.12566600  | -1.68014800 | C | -7.13881700  | 3.89758000  | -1.85285000 |
| C       | 10.75521400 | -1.65506000 | -0.62150900 | C | -5.05123600  | -2.37997100 | 0.35350700  |
| C       | 3.89581900  | 3.62926300  | 1.11817300  | C | -9.44968800  | -1.20885600 | 0.33932100  |
| C       | 8.47714400  | 2.23642900  | 1.40115900  | C | -9.33991000  | -0.25456400 | 1.44493900  |
| C       | 8.22305800  | -2.37704700 | -1.32754200 | C | -8.27621900  | 3.86150700  | -2.65108200 |
| C       | 5.32414100  | 2.44277900  | -0.42035200 | C | -9.49506000  | -2.98558400 | -1.78682900 |
| N       | 5.54636600  | 1.49296400  | 0.52697200  | C | -8.34625700  | -2.24220800 | -1.52977700 |
| C       | 9.66123400  | 2.77943900  | 1.89183700  | C | 0.27526800   | 1.85875700  | 0.52788500  |
| C       | -0.39079400 | -1.60047000 | -0.70521300 | C | 2.21917200   | 0.57341300  | 0.12569600  |
| C       | 4.85835400  | -2.17806500 | 0.42883500  | C | -9.02730600  | 2.69278600  | -2.70365200 |
| C       | 4.14683500  | 2.65223200  | 2.07783900  | N | -8.15576800  | 0.40929000  | 1.50133700  |
| N       | 4.52961200  | -1.47232700 | -1.61851600 | C | -4.36996500  | -3.44147500 | 0.95956000  |
| N       | 0.70981300  | -2.44121500 | -0.75042800 | C | -10.31907700 | -0.00719700 | 2.41073600  |
| C       | 10.87791800 | 2.12726200  | 1.69592200  | C | -5.49129400  | -2.95343800 | 3.02714000  |
| C       | 2.60380900  | -2.76288200 | -2.29354600 | C | 2.07558700   | -0.02710600 | 1.39188200  |
| C       | 6.05321000  | 2.23449500  | -1.67114600 | C | -4.66162100  | 3.58882000  | 0.15399300  |
| C       | 7.30411400  | -1.19361100 | 2.90397800  | C | -5.63177400  | 2.69456200  | -0.23722000 |
| C       | 3.79795100  | -2.89676100 | -0.07323200 | C | 1.03850500   | 0.31280200  | 2.24103200  |
| C       | 10.90424000 | 0.92868000  | 0.99925900  | C | -8.29654700  | -1.33399300 | -0.46746100 |
| C       | -2.32880400 | -0.47908600 | 0.10575200  | C | -4.58981000  | -3.72902500 | 2.29718900  |
| C       | 7.06186300  | -2.01514500 | 3.99687600  | N | -0.79070700  | 2.72849700  | 0.41440400  |
| C       | 4.97584600  | 1.60174000  | 1.73765500  | C | -4.85045400  | -1.98767200 | -1.03945500 |
| C       | 5.27367800  | -3.02255700 | 2.75871800  | C | 1.32521100   | 1.52748200  | -0.32946300 |
| C       | 6.02826900  | -2.94232300 | 3.92311100  | C | 0.12221200   | 1.27081400  | 1.79618300  |
| C       | -2.37219400 | 0.29876800  | -1.06600200 | N | -7.51666000  | 1.62461500  | -1.19166600 |
| C       | 5.92949300  | 3.07134700  | -2.78631000 | N | -5.53357200  | -0.87560900 | -1.41521400 |
| C       | 9.65870800  | -0.87220200 | -0.24961700 | N | -5.40596100  | 1.54340600  | 0.45933000  |
| C       | 4.48393000  | 3.52119800  | -0.12971600 | C | -5.96194500  | -1.58246600 | 1.07923100  |
| C       | 9.71526700  | 0.38246300  | 0.50386900  | C | -2.77202500  | 3.37688600  | 1.84593300  |
| C       | 6.68004200  | 2.82206800  | -3.92434300 | C | -10.62766600 | -2.84333800 | -0.98671100 |
| C       | 1.30417700  | -2.14728500 | -1.87169200 | C | -8.85443500  | 1.56706800  | 3.46989600  |
| C       | 7.55896400  | 1.73837600  | -3.94295100 | C | -4.62089400  | -1.00971600 | -3.61808600 |
| N       | 5.25657200  | -1.32091700 | -0.55423700 | C | -3.91561100  | -2.15703700 | -3.25352100 |
| C       | -1.43622800 | 0.15113300  | -2.07770500 | H | 9.07947700   | -4.07845100 | -2.30019400 |
| N       | 3.64950100  | -2.43099500 | -1.33121800 | H | 0.97584700   | -0.78585400 | -3.47237200 |
| C       | -1.35264800 | -1.44113600 | 0.29481500  | H | 11.75446100  | -1.34615900 | -0.34159200 |
| N       | 6.57575400  | -1.26264100 | 1.78214500  | H | 3.25188800   | 4.47148700  | 1.34762700  |
| C       | 5.57686000  | -2.16911300 | 1.70410300  | H | 7.19864200   | -2.60387500 | -1.59628700 |
| N       | 8.40584700  | -1.25620100 | -0.60918700 | H | 9.63777400   | 3.72320100  | 2.42838800  |

|    |              |             |             |   |              |             |             |
|----|--------------|-------------|-------------|---|--------------|-------------|-------------|
| C  | 8.47198300   | 1.02472100  | 0.70219300  | H | 3.70337100   | 2.69372400  | 3.06447400  |
| C  | -0.44113100  | -0.80196100 | -1.86396800 | H | 11.79745200  | 2.55467300  | 2.08022700  |
| C  | 10.56506700  | -2.81268200 | -1.35501300 | H | 2.51278600   | -3.84989800 | -2.33804600 |
| C  | 7.68157200   | 0.90451800  | -2.83658200 | H | 2.94660200   | -2.39676800 | -3.26198000 |
| Ir | -6.79855000  | -0.09507400 | 0.02473500  | H | 8.09361600   | -0.44895800 | 2.90505000  |
| C  | -10.08029900 | 0.90456400  | 3.42357000  | H | 3.13308300   | -3.63611700 | 0.34327200  |
| C  | -10.60384900 | -1.95504700 | 0.07796100  | H | 11.85534200  | 0.42796300  | 0.84631000  |
| C  | -4.03249000  | -2.64277600 | -1.96569500 | H | -3.08022800  | -0.32631000 | 0.87052200  |
| C  | -7.92208400  | 1.28865300  | 2.49042400  | H | 7.67583900   | -1.92470600 | 4.88477800  |
| C  | -1.52334400  | 2.60134800  | 1.56952000  | H | 5.20925800   | 0.81432000  | 2.44382600  |
| C  | -8.61386100  | 1.59604600  | -1.95928100 | H | 4.46742200   | -3.74153400 | 2.66638600  |
| N  | -4.38837300  | 1.67922600  | 1.25242600  | H | 5.81333900   | -3.59888700 | 4.75901500  |
| C  | -6.78900000  | 2.76132900  | -1.13258000 | H | -3.17299400  | 1.02297300  | -1.18717700 |
| N  | -1.01037700  | 1.76082100  | 2.42215200  | H | 5.25323300   | 3.92129500  | -2.77414100 |
| H  | 4.31710700   | 4.28360700  | -0.88046500 | H | 3.05853600   | 0.29730100  | -0.50375400 |
| H  | 6.59253600   | 3.47138400  | -4.78872900 | H | -9.92338000  | 2.62482700  | -3.30862700 |
| H  | 8.15634600   | 1.54735600  | -4.82944900 | H | -3.66485100  | -4.04477000 | 0.39572100  |
| H  | -1.47702700  | 0.74570700  | -2.98469000 | H | -11.26103600 | -0.53914600 | 2.36805100  |
| H  | -1.32271800  | -2.04370400 | 1.19523800  | H | -5.66867300  | -3.17769900 | 4.07465400  |
| H  | 11.41569600  | -3.41885800 | -1.64749200 | H | 2.80199500   | -0.76828100 | 1.70667000  |
| H  | 8.38054000   | 0.07471600  | -2.87886900 | H | -4.45807100  | 4.61345100  | -0.11345100 |
| H  | -10.83752100 | 1.09409100  | 4.17664500  | H | 0.91747400   | -0.14692600 | 3.21536400  |
| H  | -11.48892100 | -1.85065500 | 0.69787900  | H | -4.06992800  | -4.55509700 | 2.77028600  |
| H  | -3.49187400  | -3.53092800 | -1.66514400 | H | -1.04676400  | 3.24783100  | -0.40829600 |
| H  | -6.94564800  | 1.75695300  | 2.48607300  | H | 1.44172100   | 1.98949100  | -1.30381900 |
| H  | -9.15816700  | 0.65714900  | -1.96514500 | H | -3.00583000  | 3.25447800  | 2.90360100  |
| H  | -6.86580400  | -1.31571100 | 3.02006200  | H | -2.65261500  | 4.44072500  | 1.62718800  |
| H  | -6.00280200  | 0.47821500  | -2.89888300 | H | -11.52092500 | -3.42319700 | -1.19112400 |
| H  | -6.53776200  | 4.79738800  | -1.78445400 | H | -8.62201500  | 2.28013200  | 4.25108900  |
| H  | -8.57296500  | 4.73611500  | -3.21942400 | H | -4.56371100  | -0.59806200 | -4.61828800 |
| H  | -9.50756900  | -3.68675600 | -2.61580900 | H | -3.28470000  | -2.66778000 | -3.97300700 |
| H  | -7.48078300  | -2.38097700 | -2.17025700 | H | 7.54807500   | 2.77371500  | 1.56539000  |

## Molecular Docking Study

To check the interaction between **2[PF<sub>6</sub>]** and ribosomal RNA, in silico docking study was executed using Autodock Tools. The docking study was operated by energy minimised structure of **2[PF<sub>6</sub>]** and rRNA (PDB code: 1C2X). The lowest energy-ranked results of nine **2[PF<sub>6</sub>]** were listed in Table S4. The docked conformations with minimum binding energy were chosen for further analysis (see Fig. S20). For docking study, a grid size 70Å × 126Å × 52 Å with a grid coordinates 28.006 × 81.763 × 24.496 were taken around the active site. It is clearly observed that **2[PF<sub>6</sub>]** interact with cytosine-70, cytosine-71, guanine-13, adenine-66 nucleosides by weak supramolecular interactions such as, N-H···π and π-π interactions between benzimidazole ring of **2[PF<sub>6</sub>]** and purine, pyrimidine bases of the nucleosides.

**Table S4.** Docking summary of rRNA with **2[PF<sub>6</sub>]** by Autodock program generating different conformations applying Lamarckian GA.

| <b>Rank</b> | <b>Binding Energy (kcal/mol)</b> |
|-------------|----------------------------------|
| 1           | -11.3                            |
| 2           | -11.0                            |
| 3           | -10.6                            |
| 4           | -10.0                            |
| 5           | -9.9                             |
| 6           | -9.6                             |
| 7           | -9.5                             |
| 8           | -9.3                             |
| 9           | -9.2                             |



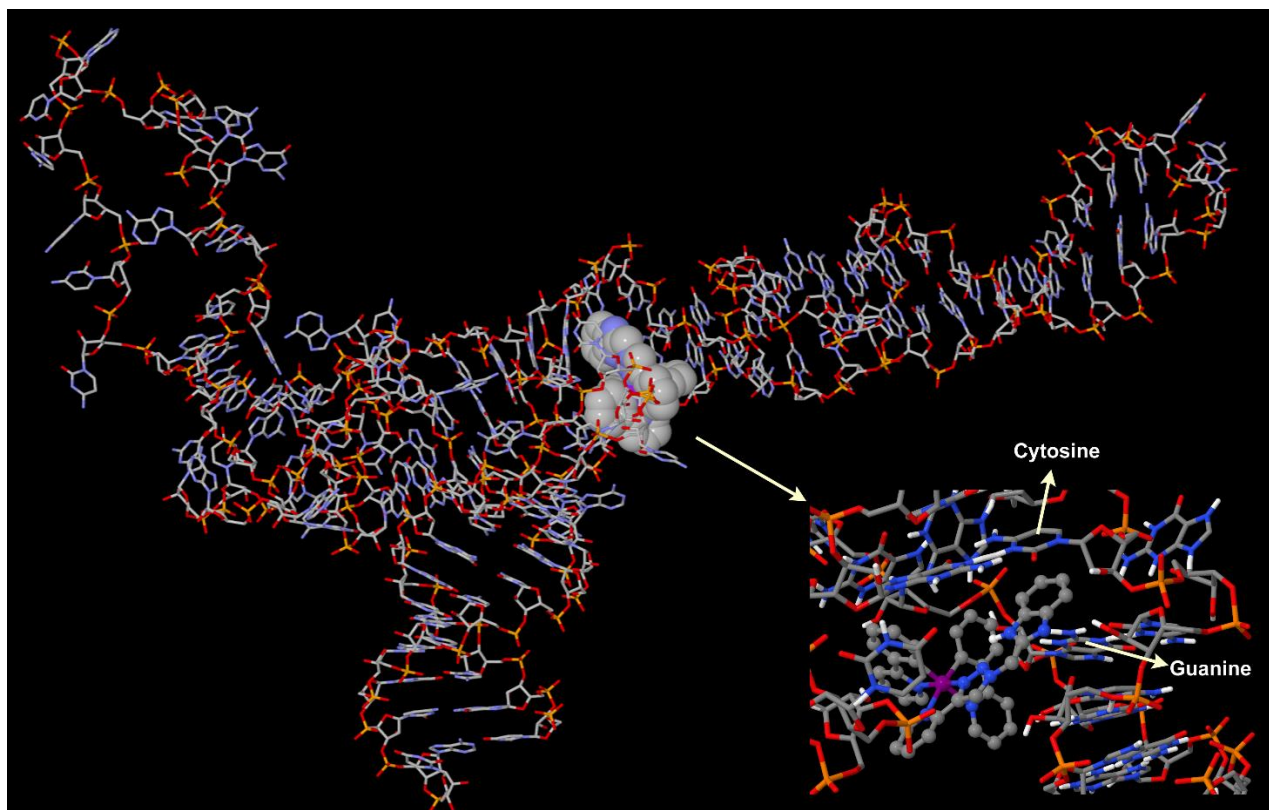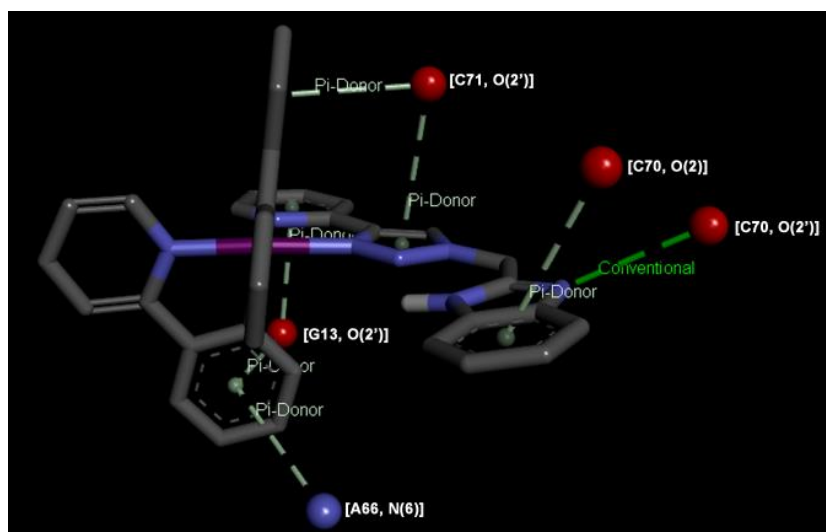

**Figure S20.** View of the interactions of  $2[\text{PF}_6]$  with nearby pyrimidine and purine bases of rRNA in docked structure.
